# Supplementary material for: Oxygen-vacancy rich in melilite to modulate the persistent luminescence for multi-functional applications
Source: Royal Society of Chemistry journal article supplement (doi:10.1039/d3tc01310c), 2023-01-01
Supplement: d3tc01310c1.pdf [file d3tc01310c1.pdf]

## Supporting Information

# Oxygen-Vacancy Rich in Melilite to Modulate the Persistent Luminescence for Multi-Functional Application

Youchao Kong<sup>1</sup>, Shurong Chen<sup>2</sup>, Jie He<sup>2</sup>, Shuwei Deng<sup>2</sup>, Xiaoshuang Li<sup>2\*</sup> and Jiangcong Zhou<sup>3\*</sup>

<sup>1</sup>Department of Physics and Electronic Engineering, Yancheng Teachers University, Yancheng 224002, P.R. China

<sup>2</sup>School of Applied Physics and Materials, Wuyi University, Jiangmen, Guangdong 529020, P.R. China

<sup>3</sup>College of Chemistry & Materials Science, Longyan University, Fujian, 364000, P.R. China

Corresponding author.

E-mail address:

Xiaoshuang Li: [lixiaoshuang12@mailsucas.ac.cn](mailto:lixiaoshuang12@mailsucas.ac.cn)

Jiangcong Zhou: [jiangcongzhou@163.com](mailto:jiangcongzhou@163.com);

## **Experimental section:**

### **Sample preparation**

All phosphors were synthesized using a traditional solid-state method. The raw materials were  $\text{CaCO}_3$  (99.99%),  $\text{MgO}$  (99.99%),  $\text{SiO}_2$  (A.R.), and  $\text{Eu}_2\text{O}_3$  (99.99%), which were used directly without any further treatment. The stoichiometric starting materials were thoroughly homogenized, the mixture was transferred into an alumina crucible and then loaded into a muffle furnace. Then the mixed samples were sintered at 1150 °C for 5 h under 95%  $\text{N}_2$ +5%  $\text{H}_2$  reductive atmosphere. The obtained samples were cooled to room temperature and then ground again in an agate mortar. Finally, the solid powder samples were sintered at 550 °C in  $\text{H}_2$  for 1h, 3h and 5 h to obtain the  $\text{V}_\text{O}$ -CMSE for subsequent analysis and measurements.

### **Characterization**

The powder X-ray diffraction (PXRD) patterns of the as-obtained samples were collected on a X' Pert PRO diffractometer (Cu  $\text{K}\alpha$  radiation,  $\lambda = 1.5406 \text{ \AA}$ ) at 298 K. The microstructure was analyzed using a scanning electron microscope (SEM, JSM-6700F) and transmission electron microscope (FE-TEM, JEM-2100F, JEOL). The X-ray photoelectron spectroscopy (XPS, Thermo fisher Scientific K-Alpha) was conducted to identify the chemical states of the elements in the sample. A FLS-980 fluorescence spectrophotometer (Xe 900, 450 W arc lamps) was employed to obtain the photoluminescence (PL), photoluminescence excitation (PLE), and decay curve spectra. An absolute photoluminescence quantum yield measurement system (Hamamatsu, Quantaaurus-QY plus C13534-31) was adopted to test the quantum

efficiency. A LTTL-3DS measurement was used to record the 3D TL glow curves at a heating rate of  $2 \text{ K}\cdot\text{s}^{-1}$ .

### **Computational methods:**

Utilizing density functional theory (DFT) as implemented in the Vienna *ab-initio* simulation package code,<sup>1</sup> we investigate the electronic structures of title compound. We used projector augmented wave (PAW) method<sup>2</sup> for the ionic cores and the generalized gradient approximation (GGA) for the exchange-correlation potential, in which the Perdew-Burke-Ernzerhof (PBE) type<sup>3</sup> exchange-correlation was adopted. The reciprocal space was sampled with  $0.03 \text{ \AA}^{-1}$  spacing in the Monkhorst-Pack scheme for structure optimization, while denser k-point grids with  $0.01 \text{ \AA}^{-1}$  spacing were adopted for properties calculation. We used a mesh cutoff energy of 400 eV to determine the self-consistent charge density. All geometries are relaxed until the Hellmann-Feynman force on atoms is less than  $0.01 \text{ eV/\AA}$  and the total energy change is less than  $1.0 \times 10^{-5} \text{ eV}$ . The calculation models were built from the crystal structure. To calculate the formation energy of oxygen vacancies, the following equation was used:  $E_{\text{vac}} = E(\text{slab+Ovac}) - E(\text{slab}) - E(\text{O})$ . Here,  $E(\text{slab+Ovac})$ ,  $E(\text{slab})$ , and  $E(\text{O})$  denote the energies of the surface with one oxygen vacancy, the clean surface, and the isolated oxygen atom, respectively.

[1] A. G. Kresse, J. Furthmüller, Efficient iterative schemes for ab initio total-energy calculations using a plane-wave basis set. Phys. Rev. B 1996, 54, 11169.

[2] B. G. Kresse, J. Furthmüller, Efficiency of Ab-initio total energy calculations for metals and semiconductors using a plane-wave basis set. *Com. Mater. Sci.* 1996, 6, 15-50.

[3] J. P. Perdew, K. Burke, M. Ernzerhof, Generalized gradient approximation made simple. *Phys. Rev. Lett.* 1996, 77, 3865.

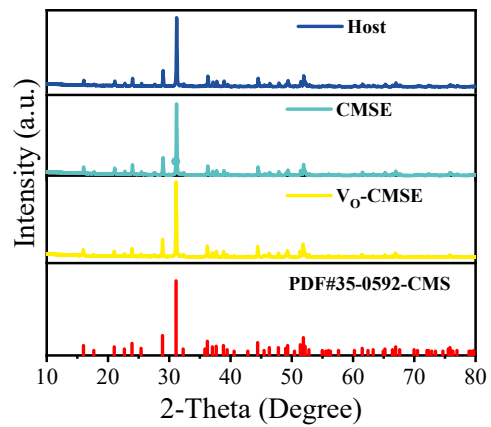

**Fig. S1** Powder XRD patterns of CMSE and V<sub>O</sub>-CMSE.

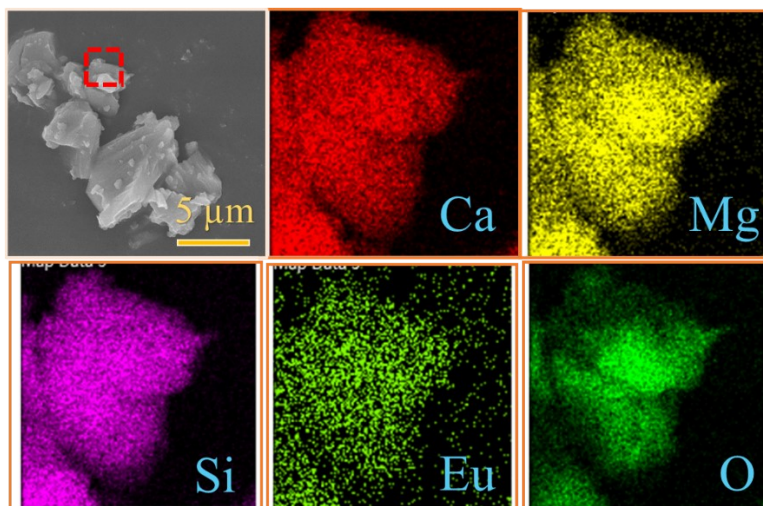

**Fig. S2** SEM and EDS element mapping images of V<sub>O</sub>-CMSE.

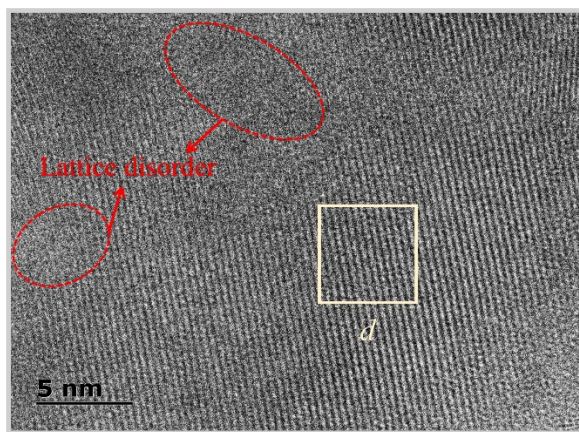

**Fig. S3** High-resolution TEM image of V<sub>O</sub>-CMSE, the lattice disorder induced by defects is marked by red arrows.

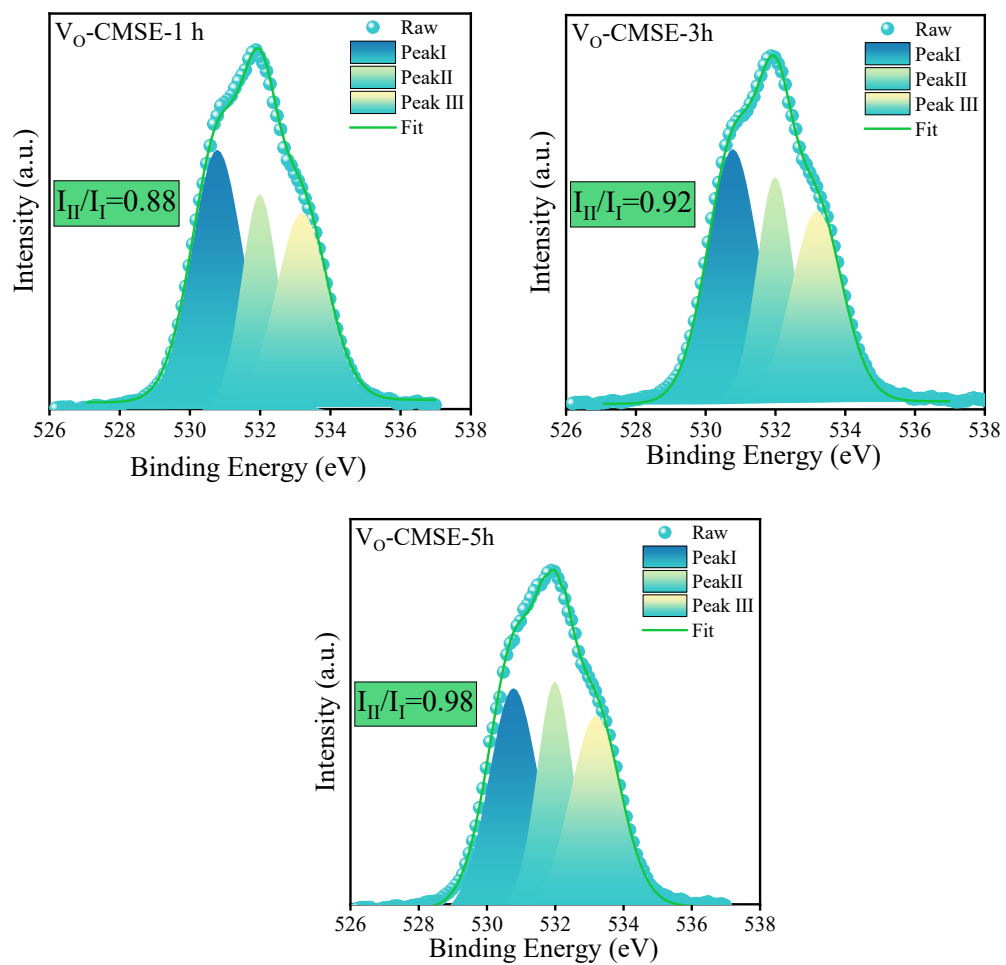

**Fig. S4.** Fitted O 1s XPS spectra of CMSE under various treatment time.



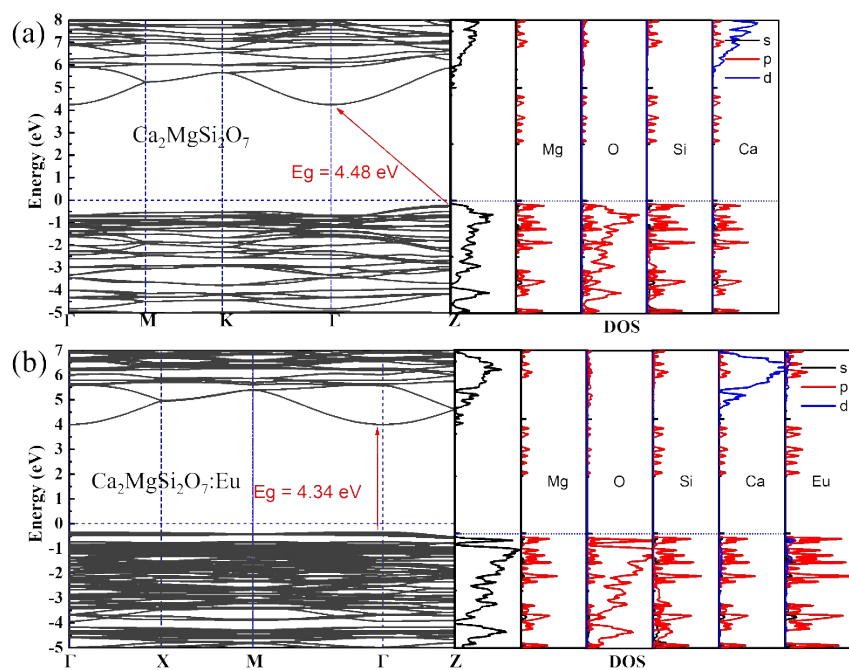

**Fig. S5** Bandgaps and DOSs of CMS and CMSE.

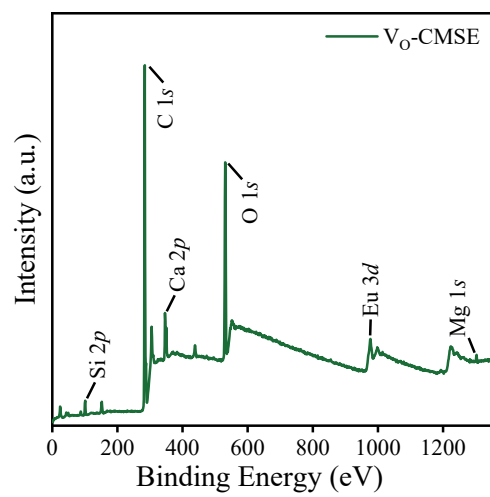

**Fig. S6** XPS spectrum of V<sub>O</sub>-CMSE.

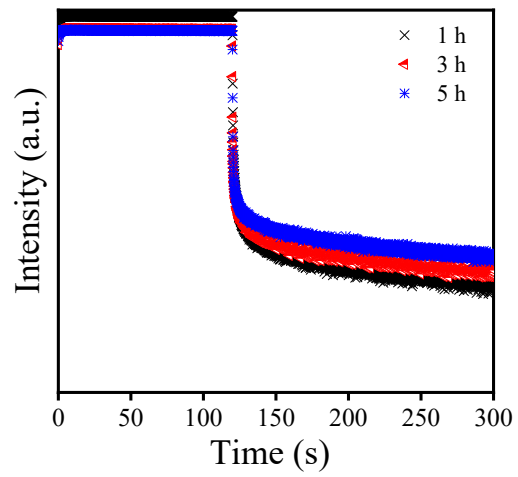

**Fig. S7** PersL decay curves of V<sub>O</sub>-CMSE under various treatment time.

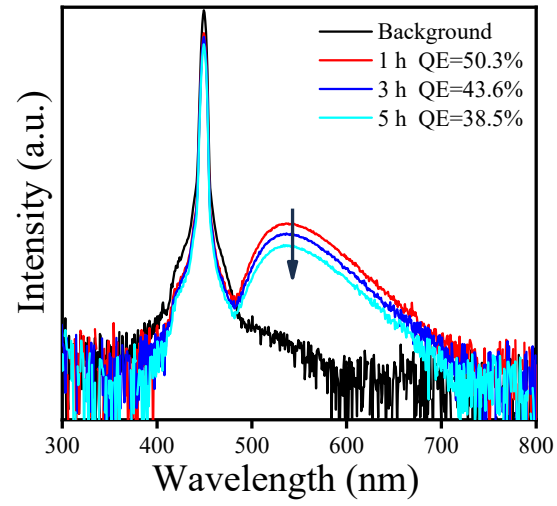

**Fig. S8** The IQE value of VO-CMSE under 450 nm excitation.

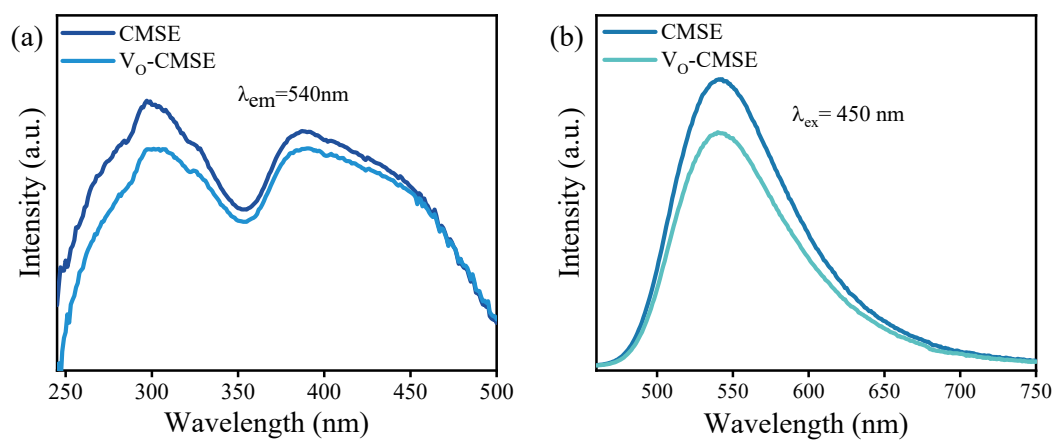

**Fig. S9** PLE and PL spectra of CMSE and V<sub>O</sub>-CMSE.

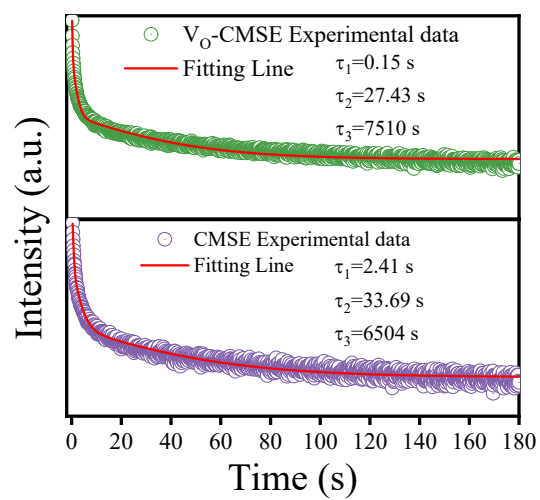

**Fig. S10** PersL decay curves of CMSE and V<sub>O</sub>-CMSE.

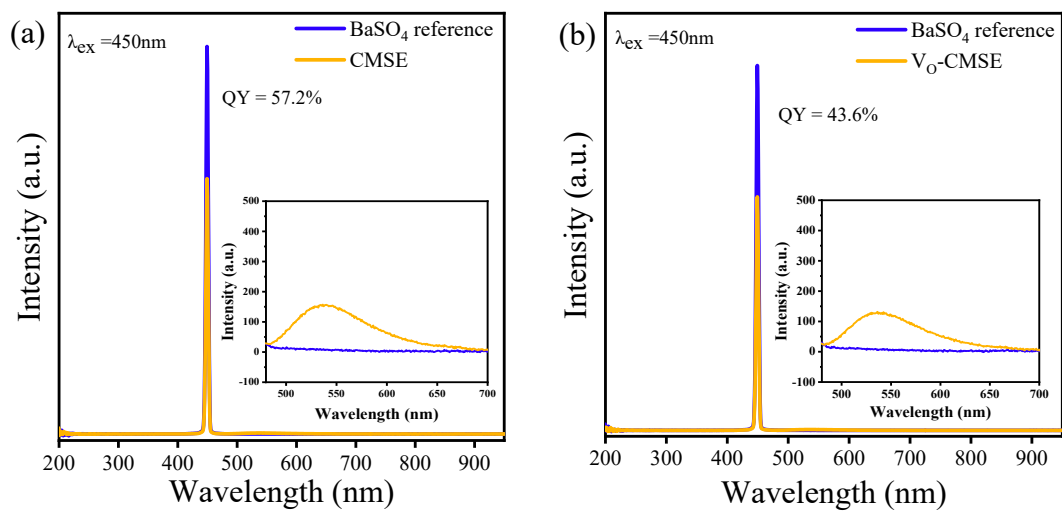

Fig. S11 QE values of CMSE and V<sub>O</sub>-CMSE.

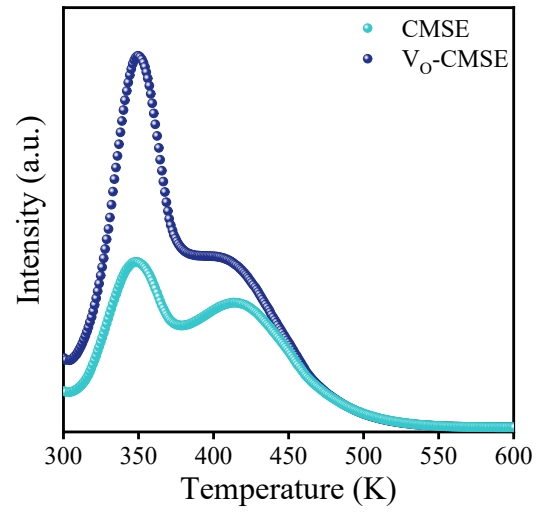

**Fig. S12** TL spectra of CMSE and V<sub>O</sub>-CMSE.



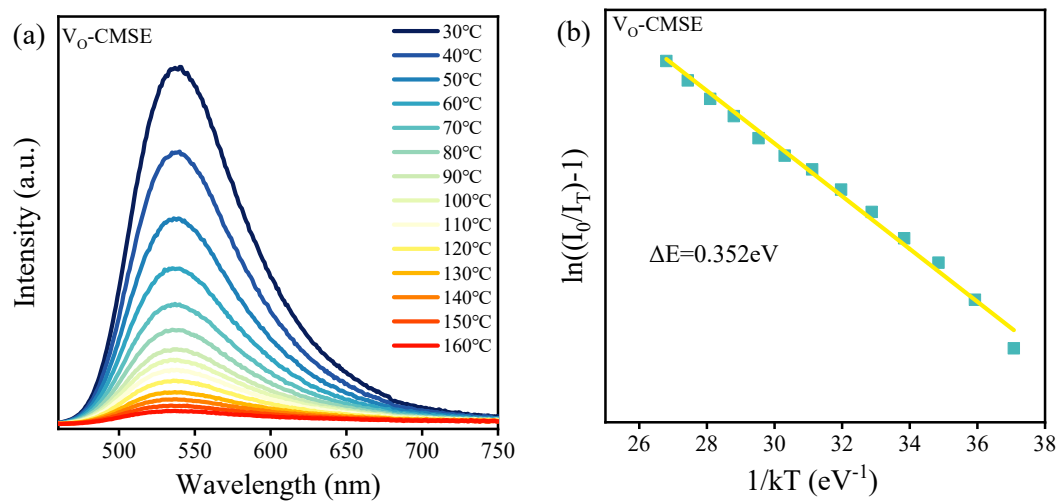

**Fig. S13** (a) Temperature dependent PL of V<sub>O</sub>-CMSE. (b) The calculated Ea value.
